# Supplementary material for: The Increased Densities, But Different Distributions, of Both C3 and S100A10 Immunopositive Astrocyte-Like Cells in Alzheimer’s Disease Brains Suggest Possible Roles for Both A1 and A2 Astrocytes in the Disease Pathogenesis
Source: PubMed Central journal article supplement (PMC7463428; doi:10.3390/brainsci10080503), 2020-07-31
Supplement: brainsci-10-00503-s001.pdf [file brainsci-10-00503-s001.pdf]

# Supplementary Materials: The Increased Densities, but Different Distributions, of Both C3 and S100A10 Immunopositive Astrocyte-Like Cells in Alzheimer's Disease Brains Suggest Possible Roles for Both A1 and A2 Astrocytes in the Disease Pathogenesis

Andrew King, Boglarka Szekely, Eda Calapkulu, Hanan Ali, Francesca Rios, Shalmal Jones and Claire Troakes

**Table S1.** Details of antibodies used for immunoperoxidase analysis.

| <b>Antibody</b> | <b>Details</b>                | <b>Supplier (Code)</b> | <b>Concentration</b> |
|-----------------|-------------------------------|------------------------|----------------------|
| C3              | Anti-C3d monoclonal rabbit    | AbCam (ab 136916)      | 1:500                |
| S100A10         | Anti-S100A10 monoclonal mouse | Lifespan (LS-B3445)    | 1:500                |

**Table S2.** Details of antibodies used for immunofluorescence.

| <b>Antibody</b> | <b>Details</b>                | <b>Supplier (Code)</b> | <b>Concentration</b> |
|-----------------|-------------------------------|------------------------|----------------------|
| C3              | Anti-C3d monoclonal rabbit    | AbCam (ab136916)       | 1:200                |
| S100A10         | Anti-S100A10 monoclonal mouse | Lifespan (LS-B3445)    | 1:200                |
| GFAP            | Anti-GFAP polyclonal rabbit   | DAKO (Z0334)           | 1:500                |
| GFAP            | Anti-GFAP monoclonal mouse    | AbCam (ab4648)         | 1:1000               |

**Table S3.** Table showing details of the Control and Alzheimer’s disease cases in the study including the relative densities of C3 and S100A10 immunopositive astrocyte-like glial cells in different cerebral areas.

| CASE | AGE           | SEX | C3               |                                            |                                        | S100A10          |                                            |                      | Other |
|------|---------------|-----|------------------|--------------------------------------------|----------------------------------------|------------------|--------------------------------------------|----------------------|-------|
|      |               |     | Cerebrum Frontal | Cerebrum Temporal                          | Hippo                                  | Cerebrum Frontal | Cerebrum Temporal                          | Hippo                |       |
| C    | BBN_4<br>193  | 51  | F                | Frontal upp cx +/-<br>Low cx ++<br>wm +    |                                        |                  | Frontal cx -<br>wm<br>++ (pv)              |                      |       |
| C    | BBN_1<br>5612 | 44  | M                | Frontal upp cx +/-<br>Low cx +++<br>wm +++ |                                        |                  | Frontal cx -<br>wm<br>+/- (pv)             | Some oedema          |       |
| C    | BBN_1<br>7130 | 35  | M                | Frontal upp cx +<br>Low cx +<br>wm<br>+++  |                                        |                  | Frontal upp cx +/-<br>low cx +/-<br>wm +/- |                      |       |
| C    | BBN_1<br>6768 | 25  | M                |                                            | Temp upp cx +/-<br>Low cx ++/+<br>wm + |                  | Temp cx -<br>wm<br>+/-                     | Congen heart disease |       |
| C    | BBN_1<br>6507 | 33  | F                | Frontal upp cx +/-<br>Low cx +++<br>wm +++ |                                        |                  | Frontal cx -<br>wm<br>+ (pv)               |                      |       |

|   |                      |    |   |                                            |                                                               |                   |                                                       |                                                      |                  |
|---|----------------------|----|---|--------------------------------------------|---------------------------------------------------------------|-------------------|-------------------------------------------------------|------------------------------------------------------|------------------|
| C | BBN_1<br>6906        | 40 | M |                                            |                                                               | Hippo<br>CA4 +/-  |                                                       |                                                      | Hippo CA4 +      |
| C | BBN_2<br>1005        | 76 | F | Frontal upp cx +/-<br>Low cx +++<br>wm +++ | Temp upp cx +/-<br>Low cx +<br>wm focal ++                    | Hippo<br>CA4 +    | Frontal cx -<br>wm<br>++/+ (pv)                       | Temp upp cx +<br>(pia)<br>Low cx -<br>wm ++/+        | Hippo Ca4<br>+   |
| C | BBN00<br>2.3263<br>3 | 81 | F | Frontal upp cx +<br>Low cx +++<br>wm +++   | Temp Upp cx +/-<br>low cx+++<br>wm +++<br>(diffuse plaques +) | Hippo<br>CA4 ++   | Frontal upp cx +/-<br>(pia)<br>Low cx +/-<br>wm +(pv) | Temp upp cx +/-<br>(pia)<br>Low cx -<br>wm +<br>(pv) | Hippo CA4<br>+/- |
| C | BBN00<br>2.2835<br>0 | 74 | M | Frontal upp cx +/-<br>Low cx +++<br>wm +++ | Temp upp cx -<br>Low cx +++<br>wm +++                         | Hippo<br>CA4 ++/+ | Frontal cx -<br>wm ++/+                               | Temp cx -<br>wm +                                    | Hippo Ca4 +      |

|   |                      |         |         | C3                                         |                                       |                     | S100A10                                         |                         |                 | Other |
|---|----------------------|---------|---------|--------------------------------------------|---------------------------------------|---------------------|-------------------------------------------------|-------------------------|-----------------|-------|
|   | CASE                 | AG<br>E | SE<br>X | Cerebrum<br>Frontal                        | Cerebrum<br>Temporal                  | Hippo               | Cerebrum<br>Frontal                             | Cerebrum<br>Temporal    | Hippo           |       |
| C | BBN00<br>2.3017<br>1 | 86      | F       | Frontal upp cx +/-<br>Low cx +++<br>wm +++ | Temp upp cx -<br>Low cx +++<br>wm +++ | Hippo<br>CA4 +++/++ | Frontal upp cx +/-<br>(pia)<br>Low cx -<br>wm + | Temp cx -<br>wm<br>++/+ | Hippo Ca4<br>++ |       |
| C | BBN00<br>2.2908<br>9 | 81      | M       | Frontal upp cx +<br>Low Cx ++              | Temp upp cx +<br>Low cx +++<br>wm +++ | Hippo<br>CA4 ++     | Frontal upp cx +<br>(pia)<br>Low cx -           | Temp cx -<br>wm +       | Hippo CA4<br>++ |       |

|   |                      |    |   |                                               |                                                   |                  |                                             |                         |                  |        |  |
|---|----------------------|----|---|-----------------------------------------------|---------------------------------------------------|------------------|---------------------------------------------|-------------------------|------------------|--------|--|
|   |                      |    |   | wm ++/+ (focal)                               |                                                   |                  | wm + (pv)                                   |                         |                  |        |  |
| C | BBN00<br>2.3284<br>4 | 81 | F | Frontal upp cx +/-<br>Low +++<br>Wm +++       | Temp upp cx +/-<br>Low<br>cx +++<br>wm<br>+++     | Hippo<br>CA4 ++  | Frontal cx-<br>wm<br>++/+ (pv)              | Temp cx-<br>wm ++/+(pv) | Hippo CA4<br>+/- |        |  |
| C | BBN_2<br>2594        | 77 | F |                                               | Temp upp cx<br>++/+<br>Low cx +++<br>wm<br>+++    |                  |                                             | Temp cx -<br>wm -       |                  |        |  |
| C | BBN_1<br>6242        | 90 | F | Frontal upp cx +/-<br>Low cx +++<br>wm +++    | Temp upp cx +<br>Low cx<br>+++<br>wm<br>+++       | Hippo<br>CA4 N/A | Frontal cx -<br>Frontal wm -                | Temp cx -<br>wm -       | Hippo CA4<br>N/A |        |  |
| C | BBN_1<br>6360        | 81 | F | Frontal upp cx +/-<br>Low cx +<br>wm +        | Temp upp cx +/-<br>Low cx +/-<br>wm<br>++ (focal) | Hippo<br>CA4 +/- | Frontal upp cx +/-<br>Low cx -<br>wm + (pv) | Temp cx -<br>Wm + (pv)  | Hippo CA4 -      | Sepsis |  |
| C | BBN_1<br>6251        | 66 | M | Frontal upp Cx +/-<br>Low cx +++<br>wm +++/++ | Temp upp cx +/-<br>Low<br>cx +++<br>wm<br>+++     | Hippo<br>CA4 +   | Frontal cx -<br>wm<br>+/- (pv)              | Temp cx -<br>Wm -       | Hippo CA4<br>-   |        |  |
| C | BBN_1<br>6662        | 73 | F | Frontal upp cx +                              | Temp upp cx<br>++/+                               | Hippo<br>CA4 +   | Frontal cx -                                | Temp upp cx +/-         | Hippo CA4 -      |        |  |

|      |                      |     |                  | C3                                                         |                                                               |                                              | S100A10                                                              |                                                                  |                  | Other |
|------|----------------------|-----|------------------|------------------------------------------------------------|---------------------------------------------------------------|----------------------------------------------|----------------------------------------------------------------------|------------------------------------------------------------------|------------------|-------|
| CASE | AGE                  | SEX | Cerebrum Frontal | Cerebrum Temporal                                          | Hippo                                                         | Cerebrum Frontal                             | Cerebrum Temporal                                                    | Hippo                                                            |                  |       |
| C    | BBN00<br>2.3088<br>2 | 77  | F                | Frontal upp cx -<br>Low Cx +<br>wm +                       | Temp upp cx -<br>Low<br>cx +<br>wm<br>++/+                    | Hippo<br>CA4 +                               | Frontal cx -<br>Frontal wm + (pv)                                    | Temp cx -<br>Temp wm +(pv)                                       | Hippo CA4<br>+/- |       |
| C    | BBN00<br>2.3284<br>4 | 81  | F                | Frontal upp Cx<br>++<br>Low Cx +++<br>wm +++               | Temp upp cx +<br>Low<br>cx +++<br>wm<br>+++                   | Hippo<br>CA4 ++                              | Frontal upp cx<br>+/-<br>Low cx +/-<br>wm + (pv)                     | Temp Cx -<br>wm +/-<br>(pv)                                      | Hippo Ca4<br>+/- | COPD  |
| C    | BBN00<br>2.3281<br>7 | 97  | F                | Frontal upp cx +/-<br>Low<br>Cx +<br>wm<br>+/-             | Temp upp cx -<br>Low<br>cx +/-<br>wm -<br>cx diff plaques +/- | Hippo<br>CA4 +/-<br>(diff<br>plaques<br>+/-) | Frontal upp Cx +/-<br>Low cx +/-<br>wm +/-<br>cx diff plaques<br>+/- | Temp upp cx -<br>Low<br>cx -<br>wm<br>+/-<br>cx diff plaques +/- | Hippo CA4 -      |       |
| C    | BBN00<br>2.3258<br>8 | 75  | F                | Frontal upp cx +<br>Low cx ++ (focal)<br>wm +++<br>(focal) | Temp upp cx -<br>Low<br>cx +++<br>wm<br>+++                   | Hippo<br>CA4 +                               | Frontal upp cx<br>-<br>Low<br>cx -<br>wm<br>+ (pv)                   | Temp upp cx -<br>Low<br>cx-<br>wm<br>+/- (pv)                    | Hippo CA4<br>+/- |       |

|   |                      |    |   |                  |                     |                 |                  |               |             |
|---|----------------------|----|---|------------------|---------------------|-----------------|------------------|---------------|-------------|
|   |                      | 78 |   | Frontal upp cx - | Temp upp cx -       |                 | Frontal upp cx - | Temp upp cx - |             |
| C | BBN00<br>2.3522<br>2 |    | F | Low cx ++        | Low<br>cx +++<br>wm | Hippo<br>CA4 ++ | Low cx -         | Low<br>cx -   | Hippo CA4 - |
|   |                      |    |   | wm +++/++        | +++                 |                 | wm +             | wm +          |             |

|                  |               |         |   | C3                                                                          |                                                                      |                                          | S100A10                                                                        |                                                                                   |                                            | Other |
|------------------|---------------|---------|---|-----------------------------------------------------------------------------|----------------------------------------------------------------------|------------------------------------------|--------------------------------------------------------------------------------|-----------------------------------------------------------------------------------|--------------------------------------------|-------|
| CASE             | AG<br>E       | SE<br>X |   | Cerebrum<br>Frontal                                                         | Cerebrum<br>Temporal                                                 | Hippo                                    | Cerebrum<br>Frontal                                                            | Cerebrum<br>Temporal                                                              | Hippo                                      |       |
| AD<br>VI<br>+LB  | BBN_2<br>4557 | 86      | F | Frontal upp cx +<br>Low<br>cx +<br>wm<br>+/-<br>cx plaques ++<br>tangles    | Temp upp cx +<br>Low<br>cx +<br>wm<br>+<br>cx plaques +++<br>tangles | Hippo<br>CA4 +<br>plaques<br>+++ tangles | Frontal upp cx<br>+++<br>Low cx +++<br>wm +++ /++<br>cx plaques +++<br>tangles | Temp upp cx +++<br>Low<br>cx +++<br>wm<br>+++<br>cx plaques +++<br>tangles        | Hippo CA4<br>+++<br>plaques +++<br>tangles |       |
| AD<br>VI +<br>LB | BBN_2<br>4199 | 83      | M | Frontal upp cx ++<br>Low<br>cx +++<br>wm<br>+++<br>cx plaques ++<br>tangles | Temp upp cx<br>+++<br>Low<br>Cx +++<br>wm<br>+++<br>cx plaques +++   | Hippo<br>CA4 +++/++<br>Plaques<br>+++    | Frontal upp cx<br>+++/++<br>Low cx +<br>wm +<br>cx plaques +++/++<br>tangles   | Temp upp cx<br>+++/++<br>Low<br>cx +++/++<br>wm<br>++<br>cx plaques ++<br>tangles | Hippo CA4<br>++<br>Plaques +               |       |

|       |               |    |   |                                                             |                                                               |                                |                                                                  |                                                                           |                                 |
|-------|---------------|----|---|-------------------------------------------------------------|---------------------------------------------------------------|--------------------------------|------------------------------------------------------------------|---------------------------------------------------------------------------|---------------------------------|
| AD V  | BBN_1<br>6230 | 80 | F | Frontal upp cx +/-<br>Low cx +/-<br>wm +<br>cx plaques +    | Temp upp cx +/-<br>Low<br>cx +/-<br>wm<br>+/-<br>cx plaques + | Hippo Ca4<br>+<br>Plaques ++   | Frontal upp cx +<br>Low cx<br>++/+<br>wm ++/+<br>cx plaques ++/+ | Temp upp cx<br>+++/<br>Low<br>cx +++/<br>wm<br>+<br>cx plaques +++/<br>++ | Hippo CA4 +<br>Plaques ++       |
| AD VI | BBN_9<br>824  | 71 | F | Frontal upp cx ++<br>Low cx +++<br>wm +++<br>cx plaques +++ | Temp upp cx +<br>Low<br>cx +/-<br>wm +<br>cx plaques +++      | Hippo CA4 ++<br>plaques<br>+++ | Frontal upp cx ++<br>Low cx ++<br>Wm +++<br>cx plaques +++       | Temp upp cx ++<br>Low<br>cx ++<br>wm +++<br>cx plaques +++                | Hippo CA4<br>++<br>plaques +++  |
| AD V  | BBN_9<br>881  | 80 | F | Frontal upp cx +++<br>Low cx +<br>wm ++<br>cx plaques ++    | Temp upp cx<br>++/+<br>Low<br>cx +<br>wm +<br>cx plaques +++  | Hippo CA4 +<br>plaques<br>+++  | Frontal upp cx +++<br>Low cx ++<br>wm +++<br>cx plaques +++      | Temp upp cx<br>+++<br>Low<br>cx ++<br>wm +++<br>cx plaques +++            | Hippo CA4<br>+++<br>plaques +++ |
| AD VI | BBN_9<br>846  | 92 | F | Frontal upp cx ++<br>Low cx +++<br>wm +++<br>cx plaques +++ | Temp upp cx +++<br>Low<br>cx +++<br>wm<br>+++<br>Cx plaques + | Hippo CA4 +++<br>Plaques ++    | Frontal upp cx ++<br>Low Cx ++/+<br>wm<br>++<br>cx plaques +++   | Temp upp cx ++<br>Low<br>cx ++<br>wm<br>++<br>Cx<br>plaques +++           | Hippo CA4<br>+++<br>plaques +++ |

C3

S100A10

Other

|          | CASE                 | AG<br>E | SE<br>X | Cerebrum<br>Frontal                                                            | Cerebrum<br>Temporal                                                            | Hippo                            | Cerebrum<br>Frontal                                                   | Cerebrum<br>Temporal                                                                 | Hippo                           |
|----------|----------------------|---------|---------|--------------------------------------------------------------------------------|---------------------------------------------------------------------------------|----------------------------------|-----------------------------------------------------------------------|--------------------------------------------------------------------------------------|---------------------------------|
| AD<br>VI | BBN_9<br>898         | 80      | M       | Frontal upp cx ++/+<br><br>Low cx +<br><br>wm +<br>cx plaques +                | Temp upp cx ++<br><br>Low<br>cx +<br><br>wm<br>++<br>cx plaques ++/+<br>tangles | Hippo<br>CA4 +<br>plaques<br>+++ | Frontal upp cx +++<br><br>Low cx ++/+<br><br>Wm ++/+<br>Cx plaques ++ | Temp upp cx<br>+++<br><br>Low<br>cx +++<br><br>wm<br>+++<br>cx plaques ++<br>tangles | Hippo CA4<br>+/-<br>Plaques +++ |
| AD<br>VI | BBN00<br>2.3285<br>6 | 74      | F       | Frontal upp cx<br>+++/<br>Low<br>cx +++<br><br>wm ++<br>cx plaques +++         | Temp upp cx ++<br><br>Low<br>cx ++/+<br><br>wm +++<br>cx plaques +++            | Hippo<br>CA4 ++<br>Plaques ++    | Frontal upp cx ++<br><br>low Cx ++<br><br>wm ++<br>cx plaques +++     | Temp upp cx<br>+++<br><br>low<br>cx ++<br><br>wm<br>++<br>cx plaques +++<br>tangles  | Hippo CA4<br>+++<br>plaques +++ |
| AD<br>VI | BBN00<br>232829      | 78      | F       | Frontal upp Cx<br>++<br><br>Low cx ++<br><br>wm +<br>cx plaques +++            | Temp upp cx ++<br><br>Low<br>cx ++<br><br>wm,<br>++<br>cx plaques ++            | Hippo<br>CA4 +/-<br>Plaques +    | Frontal upp cx ++<br><br>Low cx ++<br><br>wm + (pv)<br>cx plaques +++ | Temp upp cx ++<br><br>Low<br>cx ++<br><br>wm<br>+++ (pv)<br>cx plaques +++           | Hippo CA4 +<br>plaques +        |
| AD<br>VI | BBN32<br>545         | 75      | F       | Frontal upp cx<br>+++<br><br>Low cx ++<br><br>wm +++ (focal)<br>cx plaques +++ | Temp upp cx ++<br><br>Low<br>cx ++<br><br>wm<br>++<br>cx plaques +/-            | Hippo<br>CA4 ++/+<br>Plaques ++  | Frontal upp cx +++<br><br>Low cx ++<br><br>wm ++<br>cx plaques +++    | Temp upp cx ++<br><br>Low<br>cx +<br><br>wm<br>++<br>cx plaques ++                   | Hippo CA4<br>+++<br>plaques ++  |



|    |                      |    |   |                                                                         |                                                               |                               |                                                                |                                                                  |                               |
|----|----------------------|----|---|-------------------------------------------------------------------------|---------------------------------------------------------------|-------------------------------|----------------------------------------------------------------|------------------------------------------------------------------|-------------------------------|
| AD | BBN00<br>2.3259<br>7 | 85 | F | Frontal upp cx ++<br>Low cx ++/+<br>wm ++<br>cx plaques ++              | Temp upp cx ++<br>Low cx +<br>wm +<br>cx plaques ++           | Hippo<br>CA4 ++<br>plaques ++ | Frontal upp cx +++<br>Low cx ++<br>wm ++<br>cx plaques ++      | Temp upp cx +++<br>Low<br>cx ++/+<br>wm<br>+++<br>cx plaques +++ | Hippo CA4<br>++<br>Plaques ++ |
| AD | BBN00<br>2.3376<br>8 | 92 | F | Frontal upp cx ++<br>Low<br>cx ++ (focal)<br>wm<br>+++<br>cx plaques ++ | Temp upp Cx +<br>Low<br>Cx ++<br>wm<br>++/+<br>cx plaques +/- | Hippo<br>CA4 N/A              | Frontal upp cx +++<br>Low cx +++/++<br>wm +++<br>cx plaques ++ | Temp upp cx ++<br>Low<br>cx ++<br>wm<br>+++<br>Cx plaques ++     | Hippo CA4<br>N/A              |

AD - Alzheimer's disease (followed by modified Braak (BNE) stage), C-Control, Congen-congenital, COPD-chronic obstructive pulmonary disease, cx-cortex, diff-diffuse, Hippo-Hippocampus, LB-Lewy Bodies , pia-astroctye(s) only seen in direct vicinity of pia, pv-perivascular only, temp-temoral, upp-upper, wm-white matter. Scores refer to density of astrocyte-like cells in particular areas unless specified otherwise: - negative, +/- only very infrequent, + infrequent, ++ moderate numbers/moderate density, +++ large numbers/high density.

**Table S4.** C3 immunopositive astrocyte-like cell counts in frontal upper and lower cortex and white matter.

| C3          | Controls    | AD          | Controls    | AD          | Controls    | AD          |   |             |    |             |   |
|-------------|-------------|-------------|-------------|-------------|-------------|-------------|---|-------------|----|-------------|---|
| Upper Cx    |             |             | Lower Cx    |             | Frontal wm  |             |   |             |    |             |   |
| BBN00232633 | BBN00233768 | BBN00232633 | BBN00233768 | BBN00232633 | BBN00233768 |             |   |             |    |             |   |
| 1           | 10          | 31          | 4           | 53          | 28          |             |   |             |    |             |   |
| 1           | 6           | 32          | 4           | 74          | 44          |             |   |             |    |             |   |
| 2           | 14          | 26          | 3           | 60          | 30          |             |   |             |    |             |   |
| 5           | 10          | 29          | 5           | 63          | 34          |             |   |             |    |             |   |
| 6           | 8           | 24          | 6           | 51          | 32          |             |   |             |    |             |   |
| 3           | 9           | 33          | 7           | 57          | 24          |             |   |             |    |             |   |
| 5           | 5           | 33          | 14          | 50          | 25          |             |   |             |    |             |   |
| 5           | 7           | 20          | 17          | 49          | 32          |             |   |             |    |             |   |
| 4           | 8           | 26          | 13          | 42          | 22          |             |   |             |    |             |   |
| 8           | 9           | 27          | 15          | 35          | 14          |             |   |             |    |             |   |
| BBN00232588 | 4           | BBN00232597 | 2           | BBN00232588 | 6           | BBN00232597 | 3 | BBN00232588 | 39 | BBN00232597 | 4 |

|             |   |             |    |             |    |             |    |             |    |             |    |
|-------------|---|-------------|----|-------------|----|-------------|----|-------------|----|-------------|----|
|             | 2 |             | 2  |             | 0  |             | 4  |             | 32 |             | 12 |
|             | 3 |             | 3  |             | 4  |             | 4  |             | 67 |             | 11 |
|             | 2 |             | 1  |             | 7  |             | 2  |             | 42 |             | 13 |
|             | 0 |             | 8  |             | 0  |             | 2  |             | 30 |             | 8  |
|             | 1 |             | 3  |             | 6  |             | 5  |             | 28 |             | 5  |
|             | 0 |             | 2  |             | 6  |             | 7  |             | 31 |             | 9  |
|             | 0 |             | 5  |             | 6  |             | 1  |             | 24 |             | 2  |
|             | 0 |             | 4  |             | 9  |             | 3  |             | 13 |             | 2  |
|             | 2 |             | 3  |             | 11 |             | 1  |             | 19 |             | 9  |
| BBN0023522  | 1 | BBN32545    | 12 | BBN0023522  | 5  | BBN32545    | 4  | BBN0023522  | 37 | BBN32545    | 6  |
|             | 0 |             | 5  |             | 16 |             | 2  |             | 32 |             | 20 |
|             | 0 |             | 5  |             | 11 |             | 6  |             | 47 |             | 20 |
|             | 1 |             | 4  |             | 9  |             | 3  |             | 22 |             | 15 |
|             | 0 |             | 5  |             | 13 |             | 2  |             | 39 |             | 12 |
|             | 1 |             | 4  |             | 13 |             | 1  |             | 33 |             | 22 |
|             | 1 |             | 5  |             | 7  |             | 4  |             | 40 |             | 2  |
|             | 0 |             | 3  |             | 11 |             | 5  |             | 23 |             | 19 |
|             | 1 |             | 3  |             | 4  |             | 2  |             | 25 |             | 9  |
|             | 0 |             | 4  |             | 21 |             | 4  |             | 20 |             | 2  |
| BBN00232588 | 2 | BBN00232856 | 2  | BBN00232588 | 4  | BBN00232856 | 19 | BBN00232588 | 2  | BBN00232856 | 34 |
|             | 1 |             | 10 |             | 4  |             | 18 |             | 6  |             | 13 |
|             | 2 |             | 4  |             | 5  |             | 19 |             | 5  |             | 14 |
|             | 2 |             | 13 |             | 8  |             | 17 |             | 3  |             | 16 |
|             | 2 |             | 14 |             | 4  |             | 13 |             | 3  |             | 16 |
|             | 3 |             | 7  |             | 9  |             | 10 |             | 3  |             | 12 |
|             | 2 |             | 14 |             | 4  |             | 19 |             | 2  |             | 13 |
|             | 1 |             | 5  |             | 5  |             | 16 |             | 0  |             | 14 |
|             | 2 |             | 14 |             | 7  |             | 21 |             | 2  |             | 13 |
|             | 2 |             | 5  |             | 5  |             | 18 |             | 0  |             | 15 |
| BBN00230882 | 0 | BBN16230    | 16 | BBN00230882 | 3  | BBN16230    | 5  | BBN00230882 | 5  | BBN16230    | 4  |
|             | 0 |             | 6  |             | 2  |             | 5  |             | 3  |             | 2  |
|             | 1 |             | 7  |             | 4  |             | 8  |             | 6  |             | 7  |
|             | 0 |             | 8  |             | 8  |             | 3  |             | 6  |             | 13 |
|             | 0 |             | 8  |             | 5  |             | 4  |             | 3  |             | 9  |
|             | 0 |             | 5  |             | 3  |             | 3  |             | 7  |             | 2  |
|             | 0 |             | 10 |             | 2  |             | 2  |             | 2  |             | 2  |

|          |          |         |          |          |          |         |          |          |          |         |          |
|----------|----------|---------|----------|----------|----------|---------|----------|----------|----------|---------|----------|
|          | 1        |         | 5        |          | 2        |         | 2        |          | 3        |         | 3        |
|          | 1        |         | 5        |          | 1        |         | 2        |          | 3        |         | 3        |
|          | 0        |         | 8        |          | 2        |         | 1        |          | 8        |         | 6        |
| BBN16662 | 1        | BBN9846 | 7        | BBN16662 | 13       | BBN9846 | 17       | BBN16662 | 19       | BBN9846 | 68       |
|          | 1        |         | 7        |          | 14       |         | 27       |          | 16       |         | 89       |
|          | 0        |         | 4        |          | 14       |         | 16       |          | 14       |         | 64       |
|          | 1        |         | 2        |          | 8        |         | 16       |          | 17       |         | 67       |
|          | 1        |         | 3        |          | 12       |         | 25       |          | 8        |         | 92       |
|          | 2        |         | 4        |          | 14       |         | 17       |          | 25       |         | 73       |
|          | 2        |         | 3        |          | 19       |         | 21       |          | 20       |         | 79       |
|          | 2        |         | 4        |          | 16       |         | 18       |          | 14       |         | 67       |
|          | 3        |         | 1        |          | 19       |         | 13       |          | 16       |         | 58       |
|          | 4        |         | 1        |          | 16       |         | 17       |          | 12       |         | 55       |
| BBN16251 | 3        | BBN9824 | 4        | BBN16251 | 5        | BBN9824 | 25       | BBN16251 | 13       | BBN9824 | 65       |
|          | 0        |         | 4        |          | 5        |         | 21       |          | 10       |         | 35       |
|          | 3        |         | 5        |          | 5        |         | 33       |          | 9        |         | 64       |
|          | 0        |         | 4        |          | 6        |         | 28       |          | 11       |         | 40       |
|          | 1        |         | 8        |          | 11       |         | 30       |          | 15       |         | 16       |
|          | 1        |         | 4        |          | 5        |         | 19       |          | 15       |         | 15       |
|          | 2        |         | 9        |          | 5        |         | 23       |          | 10       |         | 16       |
|          | 1        |         | 9        |          | 9        |         | 28       |          | 3        |         | 26       |
|          | 0        |         | 4        |          | 3        |         | 29       |          | 5        |         | 33       |
|          | 1        |         | 8        |          | 6        |         | 20       |          | 10       |         | 26       |
| BBN16242 | 0        | BBN9898 | 6        | BBN16242 | 30       | BBN9898 | 4        | BBN16242 | 36       | BBN9898 | 16       |
|          | 1        |         | 8        |          | 32       |         | 5        |          | 53       |         | 26       |
|          | 0        |         | 4        |          | 21       |         | 9        |          | 56       |         | 7        |
|          | 0        |         | 6        |          | 16       |         | 2        |          | 39       |         | 11       |
|          | 0        |         | 3        |          | 16       |         | 7        |          | 47       |         | 9        |
|          | 1        |         | 2        |          | 20       |         | 6        |          | 53       |         | 9        |
|          | 3        |         | 5        |          | 19       |         | 10       |          | 41       |         | 12       |
|          | 0        |         | 6        |          | 16       |         | 8        |          | 36       |         | 9        |
|          | 2        |         | 10       |          | 11       |         | 8        |          | 48       |         | 3        |
|          | 1        |         | 6        |          | 20       |         | 9        |          | 37       |         | 8        |
| SD       | 1.590916 |         | 3.393124 |          | 8.996123 |         | 8.673755 |          | 19.43567 |         | 22.42817 |
| Mean     | 1.475    |         | 6.075    |          | 11.7375  |         | 10.8625  |          | 24.4625  |         | 23.2     |
| SEM      | 0.17787  |         | 0.379363 |          | 1.005797 |         | 0.969755 |          | 2.172974 |         | 2.507546 |

|         |          |          |
|---------|----------|----------|
| H=84.02 | H=0.852  | H=0.475  |
| P<0.001 | P=0.3559 | P=0.4906 |

**Table S5.** S100A10 immunopositive astrocyte like cell counts in frontal upper and lower cortex and white matter.

| S100A10    | Control<br>s | AD          | Controls    | AD          | control<br>s | AD          |
|------------|--------------|-------------|-------------|-------------|--------------|-------------|
| Upper cx   |              |             | Low<br>Cx   |             | Front wm     |             |
|            | BBN00232633  | BBN00233768 | BBN00232633 | BBN00233768 | BBN00232633  | BBN00233768 |
|            | 0            | 6           | 0           | 5           | 1            | 17          |
|            | 0            | 4           | 0           | 3           | 0            | 15          |
|            | 0            | 4           | 0           | 5           | 0            | 15          |
|            | 0            | 1           | 0           | 5           | 0            | 11          |
|            | 0            | 5           | 0           | 7           | 1            | 18          |
|            | 0            | 9           | 0           | 1           | 0            | 12          |
|            | 0            | 5           | 0           | 2           | 1            | 11          |
|            | 0            | 5           | 0           | 6           | 0            | 12          |
|            | 1            | 3           | 0           | 6           | 0            | 9           |
|            | 0            | 2           | 0           | 1           | 0            | 13          |
| BBN0023258 | BBN0023259   |             | BBN0023258  | BBN0023259  | BBN0023258   | BBN0023259  |
| 8          | 0            | 7           | 7           | 8           | 0            | 7           |
|            | 0            | 3           | 1           | 1           | 0            | 7           |
|            | 0            | 3           | 0           | 0           | 0            | 12          |
|            | 0            | 3           | 0           | 0           | 1            | 11          |
|            | 0            | 4           | 0           | 0           | 0            | 15          |
|            | 0            | 6           | 1           | 2           | 0            | 10          |
|            | 0            | 3           | 0           | 3           | 1            | 17          |
|            | 0            | 6           | 0           | 1           | 0            | 10          |

|            |   |            |    |            |   |            |   |            |   |            |    |
|------------|---|------------|----|------------|---|------------|---|------------|---|------------|----|
|            | 0 |            | 3  |            | 0 |            | 2 |            | 0 |            | 6  |
|            | 0 |            | 1  |            | 1 |            | 4 |            | 0 |            | 2  |
| BBN0023522 | 0 | BBN32545   | 20 | BBN0023522 | 0 | BBN32545   | 3 | BBN0023522 | 1 | BBN32545   | 1  |
|            | 0 |            | 9  |            | 0 |            | 3 |            | 0 |            | 2  |
|            | 0 |            | 7  |            | 0 |            | 0 |            | 1 |            | 1  |
|            | 0 |            | 7  |            | 0 |            | 3 |            | 0 |            | 1  |
|            | 0 |            | 9  |            | 0 |            | 3 |            | 0 |            | 5  |
|            | 0 |            | 7  |            | 0 |            | 1 |            | 0 |            | 2  |
|            | 0 |            | 8  |            | 0 |            | 2 |            | 0 |            | 3  |
|            | 0 |            | 6  |            | 0 |            | 4 |            | 2 |            | 2  |
|            | 0 |            | 4  |            | 0 |            | 2 |            | 0 |            | 2  |
|            | 0 |            | 8  |            | 0 |            | 0 |            | 0 |            | 2  |
| BBN0023258 | 1 | BBN0023285 | 2  | BBN0023258 | 2 | BBN0023285 | 3 | BBN0023258 | 1 | BBN0023285 | 6  |
| 8          |   | 6          |    | 8          |   | 6          |   | 8          |   | 6          |    |
|            | 0 |            | 4  |            | 1 |            | 3 |            | 3 |            | 4  |
|            | 0 |            | 0  |            | 0 |            | 2 |            | 0 |            | 6  |
|            | 0 |            | 2  |            | 0 |            | 2 |            | 0 |            | 7  |
|            | 0 |            | 1  |            | 0 |            | 3 |            | 0 |            | 4  |
|            | 0 |            | 2  |            | 0 |            | 2 |            | 1 |            | 4  |
|            | 1 |            | 2  |            | 1 |            | 2 |            | 0 |            | 6  |
|            | 0 |            | 1  |            | 0 |            | 0 |            | 2 |            | 13 |
|            | 0 |            | 6  |            | 1 |            | 1 |            | 0 |            | 3  |
|            | 1 |            | 4  |            | 0 |            | 2 |            | 0 |            | 5  |
| BBN0023088 | 0 | BBN16230   | 3  | BBN0023088 | 0 | BBN16230   | 6 | BBN0023088 | 0 | BBN16230   | 8  |
| 2          |   |            |    | 2          |   |            |   | 2          |   |            |    |
|            | 0 |            | 2  |            | 0 |            | 4 |            | 0 |            | 11 |
|            | 1 |            | 2  |            | 0 |            | 4 |            | 0 |            | 7  |

|          |    |         |    |          |    |         |   |          |   |         |   |
|----------|----|---------|----|----------|----|---------|---|----------|---|---------|---|
| 0        | 3  | 0       | 9  | 0        | 9  |         |   |          |   |         |   |
| 0        | 3  | 0       | 10 | 0        | 5  |         |   |          |   |         |   |
| 0        | 0  | 0       | 7  | 1        | 7  |         |   |          |   |         |   |
| 0        | 4  | 0       | 13 | 0        | 20 |         |   |          |   |         |   |
| 0        | 2  | 1       | 2  | 1        | 16 |         |   |          |   |         |   |
| 0        | 2  | 0       | 3  | 2        | 11 |         |   |          |   |         |   |
| 0        | 3  | 0       | 1  | 1        | 16 |         |   |          |   |         |   |
| BBN16662 | 0  | BBN9846 | 3  | BBN16662 | 0  | BBN9846 | 1 | BBN16662 | 0 | BBN9846 | 5 |
| 0        | 1  | 0       | 2  | 0        | 7  |         |   |          |   |         |   |
| 0        | 1  | 0       | 1  | 0        | 7  |         |   |          |   |         |   |
| 0        | 1  | 0       | 1  | 0        | 5  |         |   |          |   |         |   |
| 0        | 3  | 0       | 2  | 2        | 4  |         |   |          |   |         |   |
| 0        | 1  | 0       | 3  | 0        | 5  |         |   |          |   |         |   |
| 0        | 4  | 0       | 3  | 0        | 3  |         |   |          |   |         |   |
| 0        | 15 | 0       | 1  | 0        | 8  |         |   |          |   |         |   |
| 0        | 4  | 0       | 4  | 0        | 7  |         |   |          |   |         |   |
| 0        | 9  | 0       | 1  | 0        | 5  |         |   |          |   |         |   |
| BBN16251 | 0  | BBN9824 | 8  | BBN16251 | 0  | BBN9824 | 3 | BBN16251 | 1 | BBN9824 | 9 |
| 0        | 5  | 0       | 0  | 0        | 10 |         |   |          |   |         |   |
| 0        | 3  | 0       | 4  | 1        | 6  |         |   |          |   |         |   |
| 0        | 1  | 0       | 6  | 0        | 9  |         |   |          |   |         |   |
| 0        | 4  | 0       | 4  | 0        | 13 |         |   |          |   |         |   |
| 0        | 6  | 0       | 1  | 0        | 9  |         |   |          |   |         |   |
| 0        | 1  | 0       | 2  | 1        | 7  |         |   |          |   |         |   |
| 0        | 7  | 0       | 1  | 0        | 6  |         |   |          |   |         |   |
| 0        | 2  | 0       | 1  | 0        | 5  |         |   |          |   |         |   |
| 0        | 5  | 0       | 1  | 0        | 6  |         |   |          |   |         |   |

|          |          |         |           |          |         |         |          |          |         |         |         |
|----------|----------|---------|-----------|----------|---------|---------|----------|----------|---------|---------|---------|
| BBN16242 | 0        | BBN9898 | 9         | BBN16242 | 0       | BBN9898 | 3        | BBN16242 | 0       | BBN9898 | 3       |
|          | 0        |         | 7         |          | 0       |         | 3        |          | 0       |         | 4       |
|          | 0        |         | 5         |          | 0       |         | 5        |          | 0       |         | 3       |
|          | 1        |         | 7         |          | 0       |         | 3        |          | 0       |         | 1       |
|          | 0        |         | 10        |          | 0       |         | 1        |          | 0       |         | 3       |
|          | 0        |         | 2         |          | 0       |         | 1        |          | 0       |         | 4       |
|          | 0        |         | 16        |          | 0       |         | 3        |          | 0       |         | 2       |
|          | 1        |         | 10        |          | 0       |         | 3        |          | 0       |         | 0       |
|          | 0        |         | 4         |          | 0       |         | 3        |          | 0       |         | 3       |
|          | 0        |         | 2         |          | 0       |         | 2        |          | 0       |         | 4       |
| SD       | 0.284349 |         | 3.57239   |          | 0.35556 |         | 2.31721  |          | 0.63195 |         | 4.68224 |
|          |          |         | 8         |          | 2       |         |          |          | 5       |         | 5       |
| Mean     | 0.0875   |         | 4.65      |          | 0.1125  |         | 2.8125   |          | 0.325   |         | 7.275   |
| SEM      | 0.031791 |         | 0.39940   |          | 0.03975 |         | 0.25907  |          | 0.07065 |         | 0.52349 |
|          |          |         | 6         |          | 3       |         | 2        |          | 5       |         | 1       |
|          |          |         | H=110.335 |          |         |         | H=16.202 |          |         |         | H=91.5  |
|          |          |         | P<0.001   |          |         |         | P<0.001  |          |         |         | P<0.001 |

**Table S6.** AD cases - Comparison of C3 and S100 astrocyte-like cell counts in upper and lower frontal cortex and white matter.

| Upper cx    | AD          | AD | lower cx    | AD          | AD | Frontal wm  | AD          | AD |
|-------------|-------------|----|-------------|-------------|----|-------------|-------------|----|
| S100A10     | C3          |    | S100A10     | C3          |    | S100A10     | C3          |    |
| BBN00233768 | BBN00233768 |    | BBN00233768 | BBN00233768 |    | BBN00233768 | BBN00233768 |    |
| 6           |             | 10 |             | 5           |    | 4           |             | 17 |
| 4           |             | 6  |             | 3           |    | 4           |             | 15 |
| 4           |             | 14 |             | 5           |    | 3           |             | 15 |
| 1           |             | 10 |             | 5           |    | 5           |             | 11 |
| 5           |             | 8  |             | 7           |    | 6           |             | 18 |
|             |             |    |             |             |    |             |             | 28 |
|             |             |    |             |             |    |             |             | 44 |
|             |             |    |             |             |    |             |             | 30 |
|             |             |    |             |             |    |             |             | 34 |
|             |             |    |             |             |    |             |             | 32 |

|             |    |             |    |             |   |             |    |             |    |             |    |
|-------------|----|-------------|----|-------------|---|-------------|----|-------------|----|-------------|----|
|             | 9  |             | 9  |             | 1 |             | 7  |             | 12 |             | 24 |
|             | 5  |             | 5  |             | 2 |             | 14 |             | 11 |             | 25 |
|             | 5  |             | 7  |             | 6 |             | 17 |             | 12 |             | 32 |
|             | 3  |             | 8  |             | 6 |             | 13 |             | 9  |             | 22 |
|             | 2  |             | 9  |             | 1 |             | 15 |             | 13 |             | 14 |
| BBN00232597 | 7  | BBN00232597 | 2  | BBN00232597 | 2 | BBN00232597 | 3  | BBN00232597 | 7  | BBN00232597 | 4  |
|             | 3  |             | 2  |             | 1 |             | 4  |             | 7  |             | 12 |
|             | 3  |             | 3  |             | 0 |             | 4  |             | 12 |             | 11 |
|             | 3  |             | 1  |             | 0 |             | 2  |             | 11 |             | 13 |
|             | 4  |             | 8  |             | 0 |             | 2  |             | 15 |             | 8  |
|             | 6  |             | 3  |             | 2 |             | 5  |             | 10 |             | 5  |
|             | 3  |             | 2  |             | 3 |             | 7  |             | 17 |             | 9  |
|             | 6  |             | 5  |             | 1 |             | 1  |             | 10 |             | 2  |
|             | 3  |             | 4  |             | 2 |             | 3  |             | 6  |             | 2  |
|             | 1  |             | 3  |             | 4 |             | 1  |             | 2  |             | 9  |
| BBN32545    | 20 | BBN32545    | 12 | BBN32545    | 3 | BBN32545    | 4  | BBN32545    | 1  | BBN32545    | 6  |
|             | 9  |             | 5  |             | 3 |             | 2  |             | 2  |             | 20 |
|             | 7  |             | 5  |             | 0 |             | 6  |             | 1  |             | 20 |
|             | 7  |             | 4  |             | 3 |             | 3  |             | 1  |             | 15 |
|             | 9  |             | 5  |             | 3 |             | 2  |             | 5  |             | 12 |
|             | 7  |             | 4  |             | 1 |             | 1  |             | 2  |             | 22 |
|             | 8  |             | 5  |             | 2 |             | 4  |             | 3  |             | 2  |
|             | 6  |             | 3  |             | 4 |             | 5  |             | 2  |             | 19 |
|             | 4  |             | 3  |             | 2 |             | 2  |             | 2  |             | 9  |
|             | 8  |             | 4  |             | 0 |             | 4  |             | 2  |             | 2  |
| BBN00232856 | 2  | BBN00232856 | 2  | BBN00232856 | 3 | BBN00232856 | 19 | BBN00232856 | 6  | BBN00232856 | 34 |
|             | 4  |             | 10 |             | 3 |             | 18 |             | 4  |             | 13 |



|          |    |          |    |          |    |          |    |          |   |          |    |
|----------|----|----------|----|----------|----|----------|----|----------|---|----------|----|
| 0        | 4  | 2        | 19 | 6        | 14 |          |    |          |   |          |    |
| 2        | 13 | 2        | 17 | 7        | 16 |          |    |          |   |          |    |
| 1        | 14 | 3        | 13 | 4        | 16 |          |    |          |   |          |    |
| 2        | 7  | 2        | 10 | 4        | 12 |          |    |          |   |          |    |
| 2        | 14 | 2        | 19 | 6        | 13 |          |    |          |   |          |    |
| 1        | 5  | 0        | 16 | 13       | 14 |          |    |          |   |          |    |
| 6        | 14 | 1        | 21 | 3        | 13 |          |    |          |   |          |    |
| 4        | 5  | 2        | 18 | 5        | 15 |          |    |          |   |          |    |
| BBN16230 | 3  | BBN16230 | 16 | BBN16230 | 6  | BBN16230 | 5  | BBN16230 | 8 | BBN16230 | 4  |
| 2        | 6  | 4        | 5  | 11       | 2  |          |    |          |   |          |    |
| 2        | 7  | 4        | 8  | 7        | 7  |          |    |          |   |          |    |
| 3        | 8  | 9        | 3  | 9        | 13 |          |    |          |   |          |    |
| 3        | 8  | 10       | 4  | 5        | 9  |          |    |          |   |          |    |
| 0        | 5  | 7        | 3  | 7        | 2  |          |    |          |   |          |    |
| 4        | 10 | 13       | 2  | 20       | 2  |          |    |          |   |          |    |
| 2        | 5  | 2        | 2  | 16       | 3  |          |    |          |   |          |    |
| 2        | 5  | 3        | 2  | 11       | 3  |          |    |          |   |          |    |
| 3        | 8  | 1        | 1  | 16       | 6  |          |    |          |   |          |    |
| BBN9846  | 3  | BBN9846  | 7  | BBN9846  | 1  | BBN9846  | 17 | BBN9846  | 5 | BBN9846  | 68 |
| 1        | 7  | 2        | 27 | 7        | 89 |          |    |          |   |          |    |
| 1        | 4  | 1        | 16 | 7        | 64 |          |    |          |   |          |    |
| 1        | 2  | 1        | 16 | 5        | 67 |          |    |          |   |          |    |
| 3        | 3  | 2        | 25 | 4        | 92 |          |    |          |   |          |    |
| 1        | 4  | 3        | 17 | 5        | 73 |          |    |          |   |          |    |
| 4        | 3  | 3        | 21 | 3        | 79 |          |    |          |   |          |    |
| 15       | 4  | 1        | 18 | 8        | 67 |          |    |          |   |          |    |
| 4        | 1  | 4        | 13 | 7        | 58 |          |    |          |   |          |    |

|         |          |          |          |         |          |         |          |         |          |          |          |
|---------|----------|----------|----------|---------|----------|---------|----------|---------|----------|----------|----------|
|         | 9        |          | 1        |         | 1        |         | 17       |         | 5        |          | 55       |
| BBN9824 | 8        | BBN9824  | 4        | BBN9824 | 3        | BBN9824 | 25       | BBN9824 | 9        | BBN9824  | 65       |
|         | 5        |          | 4        |         | 0        |         | 21       |         | 10       |          | 35       |
|         | 3        |          | 5        |         | 4        |         | 33       |         | 6        |          | 64       |
|         | 1        |          | 4        |         | 6        |         | 28       |         | 9        |          | 40       |
|         | 4        |          | 8        |         | 4        |         | 30       |         | 13       |          | 16       |
|         | 6        |          | 4        |         | 1        |         | 19       |         | 9        |          | 15       |
|         | 1        |          | 9        |         | 2        |         | 23       |         | 7        |          | 16       |
|         | 7        |          | 9        |         | 1        |         | 28       |         | 6        |          | 26       |
|         | 2        |          | 4        |         | 1        |         | 29       |         | 5        |          | 33       |
|         | 5        |          | 8        |         | 1        |         | 20       |         | 6        |          | 26       |
| BBN9898 | 9        | BBN9898  | 6        | BBN9898 | 3        | BBN9898 | 4        | BBN9898 | 3        | BBN9898  | 16       |
|         | 7        |          | 8        |         | 3        |         | 5        |         | 4        |          | 26       |
|         | 5        |          | 4        |         | 5        |         | 9        |         | 3        |          | 7        |
|         | 7        |          | 6        |         | 3        |         | 2        |         | 1        |          | 11       |
|         | 10       |          | 3        |         | 1        |         | 7        |         | 3        |          | 9        |
|         | 2        |          | 2        |         | 1        |         | 6        |         | 4        |          | 9        |
|         | 16       |          | 5        |         | 3        |         | 10       |         | 2        |          | 12       |
|         | 10       |          | 6        |         | 3        |         | 8        |         | 0        |          | 9        |
|         | 4        |          | 10       |         | 3        |         | 8        |         | 3        |          | 3        |
|         | 2        |          | 6        |         | 2        |         | 9        |         | 4        |          | 8        |
| sd      | 3.572398 |          | 3.393124 |         | 2.31721  |         | 8.673755 |         | 4.682245 |          | 22.42817 |
| Mean    | 4.65     |          | 6.075    |         | 2.8125   |         | 10.8625  |         | 7.275    |          | 23.2     |
| SEM     | 0.399406 |          | 0.379363 |         | 0.259072 |         | 0.969755 |         | 0.523491 |          | 2.507546 |
|         |          | H=9.804  |          |         |          | H=50288 |          |         |          | H=34.956 |          |
|         |          | P=0.0017 |          |         |          | P<0.001 |          |         |          | P<0.001  |          |

**Table S7.** Controls- Comparison of C3 and S100 astrocyte-like cell counts in upper and lower frontal cortex and white matter.

| S100A10         | Controls | C3              | S100A1<br>0 | Controls        | C3 | S100A10         | contro<br>ls | C3              |   |                 |    |
|-----------------|----------|-----------------|-------------|-----------------|----|-----------------|--------------|-----------------|---|-----------------|----|
| Upper cx        |          |                 | Lower<br>Cx |                 |    | Frontal wm      |              |                 |   |                 |    |
| BBN00232633     |          | BBN00232633     |             | BBN00232633     |    | BBN00232633     |              | BBN00232633     |   |                 |    |
| 0               |          | 1               |             | 0               |    | 31              |              | 53              |   |                 |    |
| 0               |          | 1               |             | 0               |    | 32              |              | 74              |   |                 |    |
| 0               |          | 2               |             | 0               |    | 26              |              | 60              |   |                 |    |
| 0               |          | 5               |             | 0               |    | 29              |              | 63              |   |                 |    |
| 0               |          | 6               |             | 0               |    | 24              |              | 51              |   |                 |    |
| 0               |          | 3               |             | 0               |    | 33              |              | 57              |   |                 |    |
| 0               |          | 5               |             | 0               |    | 33              |              | 50              |   |                 |    |
| 0               |          | 5               |             | 0               |    | 20              |              | 49              |   |                 |    |
| 1               |          | 4               |             | 0               |    | 26              |              | 42              |   |                 |    |
| 0               |          | 8               |             | 0               |    | 27              |              | 35              |   |                 |    |
| BBN00232<br>588 | 0        | BBN00<br>232588 | 4           | BBN00232<br>588 | 0  | BBN00232<br>588 | 6            | BBN00232<br>588 | 0 | BBN00<br>232588 | 39 |
| 0               |          | 2               |             | 1               |    | 0               |              | 32              |   |                 |    |
| 0               |          | 3               |             | 0               |    | 4               |              | 67              |   |                 |    |
| 0               |          | 2               |             | 0               |    | 7               |              | 42              |   |                 |    |
| 0               |          | 0               |             | 0               |    | 0               |              | 30              |   |                 |    |
| 0               |          | 1               |             | 1               |    | 6               |              | 28              |   |                 |    |
| 0               |          | 0               |             | 0               |    | 6               |              | 31              |   |                 |    |
| 0               |          | 0               |             | 0               |    | 6               |              | 24              |   |                 |    |
| 0               |          | 0               |             | 0               |    | 9               |              | 13              |   |                 |    |
| 0               |          | 2               |             | 1               |    | 11              |              | 19              |   |                 |    |
| BBN00235<br>22  | 0        | BBN00<br>23522  | 1           | BBN00235<br>22  | 0  | BBN00235<br>22  | 5            | BBN00235<br>22  | 1 | BBN00<br>23522  | 37 |
| 0               |          | 0               |             | 0               |    | 16              |              | 32              |   |                 |    |
| 0               |          | 0               |             | 0               |    | 11              |              | 47              |   |                 |    |
| 0               |          | 1               |             | 0               |    | 9               |              | 22              |   |                 |    |
| 0               |          | 0               |             | 0               |    | 13              |              | 39              |   |                 |    |
| 0               |          | 1               |             | 0               |    | 13              |              | 33              |   |                 |    |
| 0               |          | 1               |             | 0               |    | 7               |              | 40              |   |                 |    |
| 0               |          | 0               |             | 0               |    | 11              |              | 23              |   |                 |    |
| 0               |          | 1               |             | 0               |    | 4               |              | 25              |   |                 |    |
| 0               |          | 0               |             | 0               |    | 21              |              | 20              |   |                 |    |

|                 |   |                 |   |                 |   |                 |    |                 |   |                 |    |
|-----------------|---|-----------------|---|-----------------|---|-----------------|----|-----------------|---|-----------------|----|
| BBN00232<br>588 | 1 | BBN00<br>232588 | 2 | BBN00232<br>588 | 2 | BBN00232<br>588 | 4  | BBN00232<br>588 | 1 | BBN00<br>232588 | 2  |
|                 | 0 |                 | 1 |                 | 1 |                 | 4  |                 | 3 |                 | 6  |
|                 | 0 |                 | 2 |                 | 0 |                 | 5  |                 | 0 |                 | 5  |
|                 | 0 |                 | 2 |                 | 0 |                 | 8  |                 | 0 |                 | 3  |
|                 | 0 |                 | 2 |                 | 0 |                 | 4  |                 | 0 |                 | 3  |
|                 | 0 |                 | 3 |                 | 0 |                 | 9  |                 | 1 |                 | 3  |
|                 | 1 |                 | 2 |                 | 1 |                 | 4  |                 | 0 |                 | 2  |
|                 | 0 |                 | 1 |                 | 0 |                 | 5  |                 | 2 |                 | 0  |
|                 | 0 |                 | 2 |                 | 1 |                 | 7  |                 | 0 |                 | 2  |
|                 | 1 |                 | 2 |                 | 0 |                 | 5  |                 | 0 |                 | 0  |
| BBN00230<br>882 | 0 | BBN00<br>230882 | 0 | BBN00230<br>882 | 0 | BBN00230<br>882 | 3  | BBN00230<br>882 | 0 | BBN00<br>230882 | 5  |
|                 | 0 |                 | 0 |                 | 0 |                 | 2  |                 | 0 |                 | 3  |
|                 | 1 |                 | 1 |                 | 0 |                 | 4  |                 | 0 |                 | 6  |
|                 | 0 |                 | 0 |                 | 0 |                 | 8  |                 | 0 |                 | 6  |
|                 | 0 |                 | 0 |                 | 0 |                 | 5  |                 | 0 |                 | 3  |
|                 | 0 |                 | 0 |                 | 0 |                 | 3  |                 | 1 |                 | 7  |
|                 | 0 |                 | 0 |                 | 0 |                 | 2  |                 | 0 |                 | 2  |
|                 | 0 |                 | 1 |                 | 1 |                 | 2  |                 | 1 |                 | 3  |
|                 | 0 |                 | 1 |                 | 0 |                 | 1  |                 | 2 |                 | 3  |
|                 | 0 |                 | 0 |                 | 0 |                 | 2  |                 | 1 |                 | 8  |
| BBN16662        | 0 | BBN16<br>662    | 1 | BBN16662        | 0 | BBN16662        | 13 | BBN16662        | 0 | BBN16<br>662    | 19 |
|                 | 0 |                 | 1 |                 | 0 |                 | 14 |                 | 0 |                 | 16 |
|                 | 0 |                 | 0 |                 | 0 |                 | 14 |                 | 0 |                 | 14 |
|                 | 0 |                 | 1 |                 | 0 |                 | 8  |                 | 0 |                 | 17 |
|                 | 0 |                 | 1 |                 | 0 |                 | 12 |                 | 2 |                 | 8  |
|                 | 0 |                 | 2 |                 | 0 |                 | 14 |                 | 0 |                 | 25 |
|                 | 0 |                 | 2 |                 | 0 |                 | 19 |                 | 0 |                 | 20 |
|                 | 0 |                 | 2 |                 | 0 |                 | 16 |                 | 0 |                 | 14 |
|                 | 0 |                 | 3 |                 | 0 |                 | 19 |                 | 0 |                 | 16 |
|                 | 0 |                 | 4 |                 | 0 |                 | 16 |                 | 0 |                 | 12 |
| BBN16251        | 0 | BBN16<br>251    | 3 | BBN16251        | 0 | BBN16251        | 5  | BBN16251        | 1 | BBN16<br>251    | 13 |
|                 | 0 |                 | 0 |                 | 0 |                 | 5  |                 | 0 |                 | 10 |
|                 | 0 |                 | 3 |                 | 0 |                 | 5  |                 | 1 |                 | 9  |

|          |          |          |        |           |        |           |   |          |   |          |    |
|----------|----------|----------|--------|-----------|--------|-----------|---|----------|---|----------|----|
| 0        | 0        | 0        | 6      | 0         | 11     |           |   |          |   |          |    |
| 0        | 1        | 0        | 11     | 0         | 15     |           |   |          |   |          |    |
| 0        | 1        | 0        | 5      | 0         | 15     |           |   |          |   |          |    |
| 0        | 2        | 0        | 5      | 1         | 10     |           |   |          |   |          |    |
| 0        | 1        | 0        | 9      | 0         | 3      |           |   |          |   |          |    |
| 0        | 0        | 0        | 3      | 0         | 5      |           |   |          |   |          |    |
| 0        | 1        | 0        | 6      | 0         | 10     |           |   |          |   |          |    |
| BBN16242 | 0        | BBN16242 | 0      | BBN16242  | 30     | BBN16242  | 0 | BBN16242 | 0 | BBN16242 | 36 |
| 0        | 1        | 0        | 32     | 0         | 53     |           |   |          |   |          |    |
| 0        | 0        | 0        | 21     | 0         | 56     |           |   |          |   |          |    |
| 1        | 0        | 0        | 16     | 0         | 39     |           |   |          |   |          |    |
| 0        | 0        | 0        | 16     | 0         | 47     |           |   |          |   |          |    |
| 0        | 1        | 0        | 20     | 0         | 53     |           |   |          |   |          |    |
| 0        | 3        | 0        | 19     | 0         | 41     |           |   |          |   |          |    |
| 1        | 0        | 0        | 16     | 0         | 36     |           |   |          |   |          |    |
| 0        | 2        | 0        | 11     | 0         | 48     |           |   |          |   |          |    |
| 0        | 1        | 0        | 20     | 0         | 37     |           |   |          |   |          |    |
| SD       | 0.284349 | 1.5909   | 0.3555 | 8.99612   | 0.6319 | 19.43567  |   |          |   |          |    |
|          |          | 16       | 62     | 3         | 55     |           |   |          |   |          |    |
| Mean     | 0.0875   | 1.475    | 0.1125 | 11.7375   | 0.325  | 24.4625   |   |          |   |          |    |
| SEM      | 0.031791 | 0.1778   | 0.0397 | 1.00579   | 0.0706 | 2.172974  |   |          |   |          |    |
|          |          | 7        | 53     | 7         | 55     |           |   |          |   |          |    |
|          | H=       |          |        | H=112.315 |        | H=110.765 |   |          |   |          |    |
|          | 47.921   |          |        |           |        |           |   |          |   |          |    |
|          | P<0.001  |          |        | P<0.001   |        | P<0.001   |   |          |   |          |    |
|          |          |          |        |           |        | 1         |   |          |   |          |    |
